# Supplementary material for: Leisure-time physical activity and mortality from influenza and pneumonia: a cohort study of 577 909 US adults
Source: PubMed Central journal article supplement — Br J Sports Med. 2023 May 16;57(19):1231–7. doi: 10.1136/bjsports-2022-106644 (PMC10579185; doi:10.1136/bjsports-2022-106644), 2023-05-16
Supplement: bjsports-2022-106644supp001.pdf [file bjsports-2022-106644supp001.pdf]

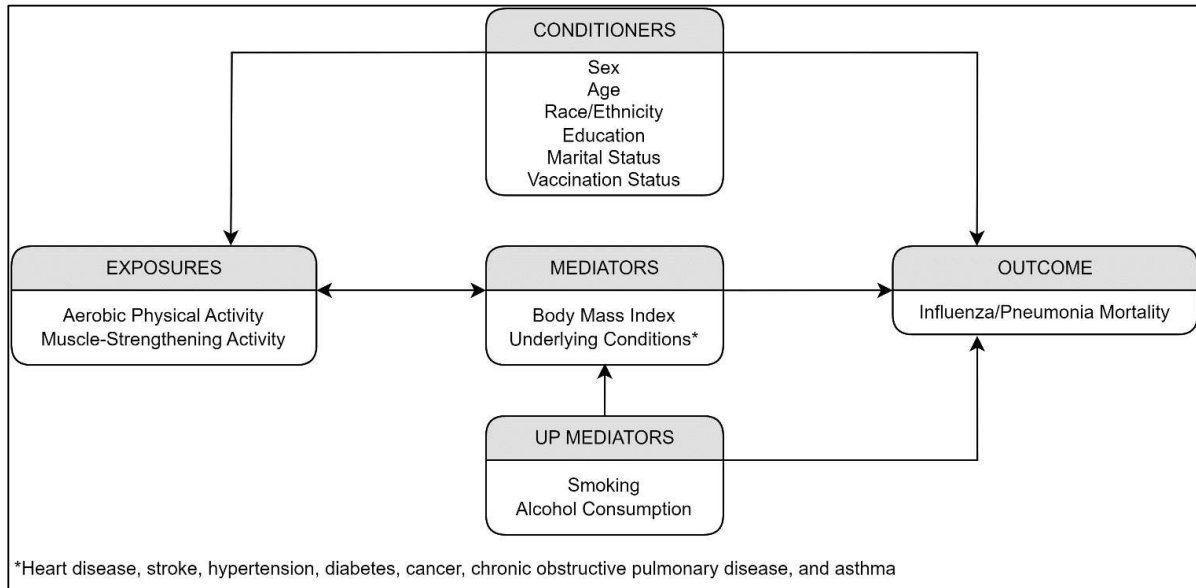

**Figure S1.** Directed acyclic graph depicting potential causal and non-causal pathways between physical activity and influenza and pneumonia mortality.

**Table S1. Hazard Ratios for Influenza and Pneumonia Deaths, by Physical Activity Levels, Stratified by Age Groups**

|                            | 50–64 Years (n=136 216) |                           | 65–74 Years (n=66 709) |                           | ≥75 Years (n=56 882) |                           |
|----------------------------|-------------------------|---------------------------|------------------------|---------------------------|----------------------|---------------------------|
|                            | Deaths                  | aHR <sup>a</sup> (95% CI) | Deaths                 | aHR <sup>a</sup> (95% CI) | Deaths               | aHR <sup>a</sup> (95% CI) |
| Guideline                  |                         |                           |                        |                           |                      |                           |
| Neither <sup>b</sup>       | 181                     | 1.00 [ref]                | 233                    | 1.00 [ref]                | 626                  | 1.00 [ref]                |
| Aerobic only <sup>c</sup>  | 34                      | 0.51 (0.32 to 0.80)       | 57                     | 0.59 (0.42 to 0.82)       | 122                  | 0.69 (0.54 to 0.88)       |
| Strength only <sup>d</sup> | 9                       | 1.04 (0.46 to 2.34)       | 11                     | 0.88 (0.41 to 1.90)       | 41                   | 1.27 (0.88 to 1.85)       |
| Both <sup>e</sup>          | 10                      | 0.39 (0.19 to 0.81)       | 20                     | 0.58 (0.35 to 0.97)       | 34                   | 0.53 (0.35 to 0.79)       |
| MVPA, min/wk               |                         |                           |                        |                           |                      |                           |
| <10                        | 147                     | 1.00 [ref]                | 197                    | 1.00 [ref]                | 514                  | 1.00 [ref]                |
| 10–149                     | 43                      | 0.88 (0.58 to 1.34)       | 47                     | 0.58 (0.38 to 0.86)       | 153                  | 0.85 (0.69 to 1.04)       |
| 150–300                    | 19                      | 0.52 (0.29 to 0.93)       | 29                     | 0.47 (0.30 to 0.73)       | 79                   | 0.70 (0.54 to 0.90)       |
| 301–600                    | 11                      | 0.34 (0.17 to 0.68)       | 26                     | 0.56 (0.32 to 0.97)       | 40                   | 0.45 (0.31 to 0.64)       |
| >600                       | 14                      | 0.55 (0.26 to 1.20)       | 22                     | 0.46 (0.28 to 0.76)       | 37                   | 0.65 (0.41 to 1.03)       |
| MSA, episodes/wk           |                         |                           |                        |                           |                      |                           |
| <2                         | 215                     | 1.00 [ref]                | 290                    | 1.00 [ref]                | 748                  | 1.00 [ref]                |
| 2                          | 2                       | 0.32 (0.08 to 1.33)       | 4                      | 0.53 (0.19 to 1.52)       | 8                    | 0.57 (0.27 to 1.18)       |
| 3                          | 6                       | 0.79 (0.32 to 1.97)       | 10                     | 1.16 (0.57 to 2.35)       | 18                   | 0.99 (0.56 to 1.75)       |
| 4–6                        | 0                       | --                        | 10                     | 1.78 (0.81 to 3.92)       | 7                    | 0.62 (0.27 to 1.42)       |
| ≥7                         | 11                      | 1.97 (0.91 to 4.25)       | 7                      | 0.72 (0.33 to 1.58)       | 42                   | 1.45 (0.99 to 2.12)       |

aHR, adjusted hazard ratio; MSA, muscle-strengthening activity; MVPA, moderate-to-vigorous physical activity.

Sample adults ≥50 years who participated in the National Health Interview Survey from 1998–2018 and were eligible for linkage to the National Death Index through 2019.

<sup>a</sup>Adjusted for sex; race/ethnicity; education; marital status; smoking status; alcohol consumption; body mass index; presence of heart disease, stroke, hypertension, diabetes, cancer, chronic obstructive pulmonary disease, and asthma; and influenza and pneumococcal vaccination status. Aerobic categories are also adjusted for muscle-strengthening categories and vice versa.

<sup>b</sup>Reported <150 min/wk of moderate-intensity equivalent physical activity and <2 episodes/wk of muscle-strengthening activity.

<sup>c</sup>Reported ≥150 min/wk of moderate-intensity equivalent physical activity and <2 episodes/wk of muscle-strengthening activity.

<sup>d</sup>Reported ≥2 episodes/wk of muscle-strengthening activity and <150 min/wk of moderate-intensity equivalent physical activity.

<sup>e</sup>Reported ≥150 min/wk of moderate-intensity equivalent physical activity and ≥2 episodes/wk of muscle-strengthening activity.

**Table S2. Hazard Ratios for Influenza and Pneumonia Deaths, by Physical Activity Levels, Restricted to Those Without Any Baseline Medical Conditions**

|                            | Deaths | No. (weighted %) | Person-Years | Unadjusted HR (95% CI) | Adjusted HR <sup>a</sup> (95% CI) | Adjusted HR <sup>b</sup> (95% CI) |
|----------------------------|--------|------------------|--------------|------------------------|-----------------------------------|-----------------------------------|
| Guideline                  |        |                  |              |                        |                                   |                                   |
| Neither <sup>c</sup>       | 248    | 143 954 (46.0)   | 1 692 388    | 1.00 [ref]             | 1.00 [ref]                        | 1.00 [ref]                        |
| Aerobic only <sup>d</sup>  | 65     | 85 473 (28.6)    | 935 412      | 0.43 (0.31 to 0.59)    | 0.55 (0.40 to 0.76)               | 0.56 (0.37 to 0.85)               |
| Strength only <sup>e</sup> | 17     | 10 082 (3.4)     | 115 422      | 0.91 (0.52 to 1.59)    | 1.09 (0.62 to 1.90)               | 1.02 (0.49 to 2.09)               |
| Both <sup>f</sup>          | 26     | 63 604 (22.0)    | 671 672      | 0.25 (0.16 to 0.41)    | 0.53 (0.32 to 0.88)               | 0.62 (0.29 to 1.35)               |
| MVPA, min/wk               |        |                  |              |                        |                                   |                                   |
| <10                        | 209    | 97 601 (30.4)    | 1 172 197    | 1.00 [ref]             | 1.00 [ref]                        | 1.00 [ref]                        |
| 10–149                     | 56     | 56 435 (19.0)    | 635 613      | 0.51 (0.36 to 0.72)    | 0.68 (0.47 to 0.98)               | 0.59 (0.36 to 0.96)               |
| 150–300                    | 40     | 48 054 (16.3)    | 529 713      | 0.35 (0.24 to 0.52)    | 0.55 (0.37 to 0.82)               | 0.49 (0.29 to 0.85)               |
| 301–600                    | 24     | 51 946 (17.6)    | 556 921      | 0.25 (0.15 to 0.40)    | 0.41 (0.25 to 0.69)               | 0.43 (0.21 to 0.87)               |
| >600                       | 27     | 49 077 (16.7)    | 520 450      | 0.28 (0.17 to 0.45)    | 0.45 (0.27 to 0.76)               | 0.42 (0.18 to 0.98)               |
| MSA, episodes/wk           |        |                  |              |                        |                                   |                                   |
| <2                         | 313    | 229 427 (74.6)   | 2 627 800    | 1.00 [ref]             | 1.00 [ref]                        | 1.00 [ref]                        |
| 2                          | 4      | 17 720 (6.1)     | 187 679      | 0.18 (0.06 to 0.49)    | 0.51 (0.18 to 1.47)               | 0.91 (0.26 to 3.18)               |
| 3                          | 18     | 25 139 (8.7)     | 277 393      | 0.65 (0.38 to 1.13)    | 1.69 (0.97 to 2.94)               | 1.48 (0.44 to 4.98)               |
| 4–6                        | 5      | 17 711 (6.2)     | 183 673      | 0.13 (0.05 to 0.38)    | 0.43 (0.15 to 1.26)               | 1.01 (0.40 to 2.54)               |
| ≥7                         | 16     | 13 116 (4.4)     | 138 349      | 0.80 (0.45 to 1.41)    | 1.20 (0.66 to 2.17)               | 1.17 (0.57 to 2.37)               |

HR, hazard ratio; MSA, muscle-strengthening activity; MVPA, moderate-to-vigorous physical activity.

Sample adults who participated in the National Health Interview Survey from 1998–2018 and were eligible for linkage to the National Death Index through 2019. Restricted to those without baseline presence of heart disease, stroke, hypertension, diabetes, cancer, chronic obstructive pulmonary disease, or asthma (N=303 113).

<sup>a</sup>Adjusted for sex, age, race/ethnicity, education, and marital status. Aerobic categories are also adjusted for muscle-strengthening categories and vice versa.

<sup>b</sup>Adjusted for sex, age, race/ethnicity, education, marital status, smoking status, alcohol consumption, body mass index, and influenza and pneumococcal vaccination status. Aerobic categories are also adjusted for muscle-strengthening categories and vice versa.

<sup>c</sup>Reported <150 min/wk of moderate-intensity equivalent physical activity and <2 episodes/wk of muscle-strengthening activity.

<sup>d</sup>Reported ≥150 min/wk of moderate-intensity equivalent physical activity and <2 episodes/wk of muscle-strengthening activity.

<sup>e</sup>Reported ≥2 episodes/wk of muscle-strengthening activity and <150 min/wk of moderate-intensity equivalent physical activity.

<sup>f</sup>Reported ≥150 min/wk of moderate-intensity equivalent physical activity and ≥2 episodes/wk of muscle-strengthening activity.

**Table S3. Hazard Ratios for Influenza and Pneumonia Deaths, by Physical Activity Levels, Restricted to Never Smokers**

|                            | Deaths | No. (weighted %) | Person-Years | Unadjusted HR (95% CI) | Adjusted HR <sup>a</sup> (95% CI) | Adjusted HR <sup>b</sup> (95% CI) |
|----------------------------|--------|------------------|--------------|------------------------|-----------------------------------|-----------------------------------|
| Guideline                  |        |                  |              |                        |                                   |                                   |
| Neither <sup>c</sup>       | 571    | 170 051 (48.5)   | 1 794 912    | 1.00 [ref]             | 1.00 [ref]                        | 1.00 [ref]                        |
| Aerobic only <sup>d</sup>  | 122    | 88 039 (27.1)    | 894 531      | 0.44 (0.35 to 0.56)    | 0.69 (0.54 to 0.88)               | 0.73 (0.57 to 0.94)               |
| Strength only <sup>e</sup> | 24     | 11 705 (3.5)     | 119 419      | 1.34 (0.88 to 2.05)    | 0.67 (0.42 to 1.09)               | 0.71 (0.44 to 1.15)               |
| Both <sup>f</sup>          | 34     | 64 268 (20.8)    | 632 766      | 0.16 (0.11 to 0.23)    | 0.44 (0.29 to 0.65)               | 0.48 (0.33 to 0.72)               |
| MVPA, min/wk               |        |                  |              |                        |                                   |                                   |
| <10                        | 481    | 115 830 (32.0)   | 1 235 454    | 1.00 [ref]             | 1.00 [ref]                        | 1.00 [ref]                        |
| 10–149                     | 114    | 65 926 (20.1)    | 678 877      | 0.38 (0.31 to 0.48)    | 0.60 (0.47 to 0.75)               | 0.63 (0.50 to 0.80)               |
| 150–300                    | 72     | 52 365 (16.3)    | 535 044      | 0.32 (0.24 to 0.42)    | 0.63 (0.47 to 0.84)               | 0.67 (0.50 to 0.90)               |
| 301–600                    | 47     | 53 052 (16.7)    | 531 173      | 0.21 (0.15 to 0.29)    | 0.52 (0.36 to 0.76)               | 0.56 (0.39 to 0.81)               |
| >600                       | 37     | 46 890 (14.9)    | 461 080      | 0.23 (0.15 to 0.36)    | 0.62 (0.38 to 0.99)               | 0.68 (0.43 to 1.09)               |
| MSA, episodes/wk           |        |                  |              |                        |                                   |                                   |
| <2                         | 693    | 258 090 (75.7)   | 2 689 443    | 1.00 [ref]             | 1.00 [ref]                        | 1.00 [ref]                        |
| 2                          | 9      | 18 444 (5.9)     | 182 334      | 0.15 (0.08 to 0.31)    | 0.50 (0.24 to 1.01)               | 0.52 (0.26 to 1.06)               |
| 3                          | 14     | 25 844 (8.3)     | 263 660      | 0.21 (0.11 to 0.39)    | 0.61 (0.32 to 1.16)               | 0.64 (0.34 to 1.22)               |
| 4–6                        | 5      | 17 999 (5.9)     | 175 396      | 0.14 (0.05 to 0.35)    | 0.46 (0.18 to 1.18)               | 0.48 (0.19 to 1.21)               |
| ≥7                         | 30     | 13 686 (4.3)     | 130 795      | 0.76 (0.52 to 1.13)    | 1.00 (0.67 to 1.52)               | 1.00 (0.66 to 1.51)               |

HR, hazard ratio; MSA, muscle-strengthening activity; MVPA, moderate-to-vigorous physical activity.

Sample adults who participated in the National Health Interview Survey from 1998–2018 and were eligible for linkage to the National Death Index through 2019. Restricted to those who reported never smoking (N=334 063).

<sup>a</sup>Adjusted for sex, age, race/ethnicity, education, and marital status. Aerobic categories are also adjusted for muscle-strengthening categories and vice versa.

<sup>b</sup>Adjusted for sex; age; race/ethnicity; education; marital status; alcohol consumption; body mass index; presence of heart disease, stroke, hypertension, diabetes, cancer, chronic obstructive pulmonary disease, and asthma; and influenza and pneumococcal vaccination status. Aerobic categories are also adjusted for muscle-strengthening categories and vice versa.

<sup>c</sup>Reported <150 min/wk of moderate-intensity equivalent physical activity and <2 episodes/wk of muscle-strengthening activity.

<sup>d</sup>Reported ≥150 min/wk of moderate-intensity equivalent physical activity and <2 episodes/wk of muscle-strengthening activity.

<sup>e</sup>Reported ≥2 episodes/wk of muscle-strengthening activity and <150 min/wk of moderate-intensity equivalent physical activity.

<sup>f</sup>Reported ≥150 min/wk of moderate-intensity equivalent physical activity and ≥2 episodes/wk of muscle-strengthening activity.

**Table S4. Hazard Ratios for Influenza and Pneumonia Deaths, by Physical Activity Levels, Restricted to Participants with Normal Body Mass Index at Baseline**

|                            | Deaths | No. (weighted %) | Person-Years | Unadjusted HR (95% CI) | Adjusted HR <sup>a</sup> (95% CI) | Adjusted HR <sup>b</sup> (95% CI) |
|----------------------------|--------|------------------|--------------|------------------------|-----------------------------------|-----------------------------------|
| Guideline                  |        |                  |              |                        |                                   |                                   |
| Neither <sup>c</sup>       | 423    | 96 524 (45.3)    | 1 033 430    | 1.00 [ref]             | 1.00 [ref]                        | 1.00 [ref]                        |
| Aerobic only <sup>d</sup>  | 118    | 56 080 (28.3)    | 598 886      | 0.52 (0.42 to 0.65)    | 0.77 (0.61 to 0.98)               | 0.83 (0.65 to 1.06)               |
| Strength only <sup>e</sup> | 35     | 7725 (3.8)       | 82 511       | 1.13 (0.75 to 1.69)    | 1.31 (0.88 to 1.95)               | 1.40 (0.94 to 2.09)               |
| Both <sup>f</sup>          | 37     | 43 442 (22.6)    | 454 761      | 0.20 (0.14 to 0.30)    | 0.53 (0.36 to 0.77)               | 0.61 (0.41 to 0.91)               |
| MVPA, min/wk               |        |                  |              |                        |                                   |                                   |
| <10                        | 350    | 66 885 (30.5)    | 712 422      | 1.00 [ref]             | 1.00 [ref]                        | 1.00 [ref]                        |
| 10–149                     | 108    | 37 364 (18.6)    | 403 520      | 0.52 (0.41 to 0.67)    | 0.77 (0.60 to 0.98)               | 0.82 (0.64 to 1.05)               |
| 150–300                    | 69     | 31 741 (16.1)    | 343 469      | 0.38 (0.29 to 0.49)    | 0.68 (0.52 to 0.90)               | 0.74 (0.56 to 0.98)               |
| 301–600                    | 44     | 34 948 (17.9)    | 369 811      | 0.25 (0.18 to 0.36)    | 0.56 (0.38 to 0.81)               | 0.61 (0.42 to 0.90)               |
| >600                       | 42     | 32 833 (16.9)    | 340 366      | 0.30 (0.20 to 0.44)    | 0.67 (0.43 to 1.04)               | 0.74 (0.48 to 1.16)               |
| MSA, episodes/wk           |        |                  |              |                        |                                   |                                   |
| <2                         | 541    | 152 604 (73.6)   | 1 632 315    | 1.00 [ref]             | 1.00 [ref]                        | 1.00 [ref]                        |
| 2                          | 10     | 12 101 (6.2)     | 127 321      | 0.21 (0.11 to 0.41)    | 0.66 (0.34 to 1.31)               | 0.72 (0.37 to 1.42)               |
| 3                          | 18     | 17 310 (9.0)     | 187 472      | 0.34 (0.20 to 0.59)    | 0.91 (0.53 to 1.57)               | 0.97 (0.56 to 1.68)               |
| 4–6                        | 10     | 11 674 (6.2)     | 120 510      | 0.27 (0.13 to 0.55)    | 0.82 (0.40 to 1.71)               | 0.90 (0.43 to 1.88)               |
| ≥7                         | 34     | 10 082 (5.0)     | 101 970      | 1.01 (0.67 to 1.51)    | 1.25 (0.81 to 1.91)               | 1.30 (0.85 to 2.00)               |

HR, hazard ratio; MSA, muscle-strengthening activity; MVPA, moderate-to-vigorous physical activity.

Sample adults who participated in the National Health Interview Survey from 1998–2018 and were eligible for linkage to the National Death Index through 2019. Restricted to those who reported body mass index in the normal range (N=203 771).

<sup>a</sup>Adjusted for sex, age, race/ethnicity, education, and marital status. Aerobic categories are also adjusted for muscle-strengthening categories and vice versa.

<sup>b</sup>Adjusted for sex; age; race/ethnicity; education; marital status; smoking status; alcohol consumption; presence of heart disease, stroke, hypertension, diabetes, cancer, chronic obstructive pulmonary disease, and asthma; and influenza and pneumococcal vaccination status. Aerobic categories are also adjusted for muscle-strengthening categories and vice versa.

<sup>c</sup>Reported <150 min/wk of moderate-intensity equivalent physical activity and <2 episodes/wk of muscle-strengthening activity.

<sup>d</sup>Reported ≥150 min/wk of moderate-intensity equivalent physical activity and <2 episodes/wk of muscle-strengthening activity.

<sup>e</sup>Reported ≥2 episodes/wk of muscle-strengthening activity and <150 min/wk of moderate-intensity equivalent physical activity.

<sup>f</sup>Reported ≥150 min/wk of moderate-intensity equivalent physical activity and ≥2 episodes/wk of muscle-strengthening activity.

**Table S5. Hazard Ratios for Influenza and Pneumonia Deaths, by Physical Activity Levels, Excluding Those Who Died Within Two Years of the Interview**

|                            | Deaths | No. (weighted %) | Person-Years | Unadjusted HR (95% CI) | Adjusted HR <sup>a</sup> (95% CI) | Adjusted HR <sup>b</sup> (95% CI) |
|----------------------------|--------|------------------|--------------|------------------------|-----------------------------------|-----------------------------------|
| Guideline                  |        |                  |              |                        |                                   |                                   |
| Neither <sup>c</sup>       | 1001   | 294 377 (50.0)   | 3 124 774    | 1.00 [ref]             | 1.00 [ref]                        | 1.00 [ref]                        |
| Aerobic only <sup>d</sup>  | 222    | 151 837 (27.5)   | 1 570 564    | 0.45 (0.38 to 0.53)    | 0.61 (0.51 to 0.72)               | 0.65 (0.55 to 0.78)               |
| Strength only <sup>e</sup> | 65     | 20 246 (3.6)     | 208 243      | 1.05 (0.78 to 1.42)    | 1.18 (0.88 to 1.59)               | 1.23 (0.92 to 1.66)               |
| Both <sup>f</sup>          | 71     | 100 311 (18.9)   | 1 016 147    | 0.21 (0.16 to 0.28)    | 0.47 (0.35 to 0.63)               | 0.53 (0.39 to 0.71)               |
| MVPA, min/wk               |        |                  |              |                        |                                   |                                   |
| <10                        | 817    | 202 717 (33.5)   | 2 174 582    | 1.00 [ref]             | 1.00 [ref]                        | 1.00 [ref]                        |
| 10–149                     | 249    | 111 906 (20.1)   | 1 158 435    | 0.56 (0.47 to 0.67)    | 0.76 (0.64 to 0.91)               | 0.82 (0.68 to 0.97)               |
| 150–300                    | 126    | 85 327 (15.6)    | 886 108      | 0.35 (0.28 to 0.43)    | 0.55 (0.45 to 0.69)               | 0.60 (0.48 to 0.75)               |
| 301–600                    | 86     | 86 675 (16.0)    | 885 849      | 0.25 (0.19 to 0.32)    | 0.46 (0.35 to 0.61)               | 0.51 (0.39 to 0.67)               |
| >600                       | 81     | 80 146 (14.9)    | 814 754      | 0.29 (0.22 to 0.39)    | 0.54 (0.39 to 0.74)               | 0.60 (0.44 to 0.83)               |
| MSA, episodes/wk           |        |                  |              |                        |                                   |                                   |
| <2                         | 1223   | 446 214 (77.5)   | 4 695 338    | 1.00 [ref]             | 1.00 [ref]                        | 1.00 [ref]                        |
| 2                          | 15     | 28 344 (5.3)     | 285 740      | 0.17 (0.10 to 0.29)    | 0.47 (0.28 to 0.82)               | 0.50 (0.29 to 0.86)               |
| 3                          | 37     | 40 732 (7.6)     | 426 621      | 0.38 (0.26 to 0.55)    | 0.96 (0.65 to 1.42)               | 1.02 (0.69 to 1.49)               |
| 4–6                        | 16     | 27 389 (5.2)     | 273 089      | 0.22 (0.13 to 0.38)    | 0.66 (0.37 to 1.17)               | 0.69 (0.39 to 1.22)               |
| ≥7                         | 68     | 24 092 (4.3)     | 238 940      | 1.12 (0.85 to 1.49)    | 1.52 (1.13 to 2.04)               | 1.51 (1.12 to 2.03)               |

HR, hazard ratio; MSA, muscle-strengthening activity; MVPA, moderate-to-vigorous physical activity.

Sample adults who participated in the National Health Interview Survey from 1998–2018 and were eligible for linkage to the National Death Index through 2019. Restricted to those who did not die within 2 years of the NHIS interview (N=566 771).

<sup>a</sup>Adjusted for sex, age, race/ethnicity, education, and marital status. Aerobic categories are also adjusted for muscle-strengthening categories and vice versa.

<sup>b</sup>Adjusted for sex; age; race/ethnicity; education; marital status; smoking status; alcohol consumption; body mass index; presence of heart disease, stroke, hypertension, diabetes, cancer, chronic obstructive pulmonary disease, and asthma; and influenza and pneumococcal vaccination status. Aerobic categories are also adjusted for muscle-strengthening categories and vice versa.

<sup>c</sup>Reported <150 min/wk of moderate-intensity equivalent physical activity and <2 episodes/wk of muscle-strengthening activity.

<sup>d</sup>Reported ≥150 min/wk of moderate-intensity equivalent physical activity and <2 episodes/wk of muscle-strengthening activity.

<sup>e</sup>Reported ≥2 episodes/wk of muscle-strengthening activity and <150 min/wk of moderate-intensity equivalent physical activity.

<sup>f</sup>Reported ≥150 min/wk of moderate-intensity equivalent physical activity and ≥2 episodes/wk of muscle-strengthening activity.

**Table S6. Hazard Ratios for Influenza and Pneumonia Deaths, by Vigorous-Intensity Aerobic Physical Activity**

| VPA (min/wk) | Deaths | No. (weighted %) | Person-Years | Unadjusted HR (95% CI) | Adjusted HR <sup>a</sup> (95% CI) | Adjusted HR <sup>b</sup> (95% CI) | Adjusted HR <sup>c</sup> (95% CI) |
|--------------|--------|------------------|--------------|------------------------|-----------------------------------|-----------------------------------|-----------------------------------|
| <10          | 1316   | 343 035 (56.6)   | 3 496 996    | 1.00 [ref]             | 1.00 [ref]                        | 1.00 [ref]                        | 1.00 [ref]                        |
| 10–74        | 76     | 68 231 (12.7)    | 718 826      | 0.29<br>(0.22 to 0.38) | 0.79<br>(0.60 to 1.04)            | 0.87<br>(0.66 to 1.15)            | 0.88<br>(0.67 to 1.17)            |
| 75–150       | 41     | 62 010 (11.5)    | 650 634      | 0.15<br>(0.11 to 0.22) | 0.40<br>(0.28 to 0.57)            | 0.44<br>(0.30 to 0.63)            | 0.44<br>(0.31 to 0.64)            |
| >150         | 83     | 104 633 (19.2)   | 1 064 270    | 0.20<br>(0.15 to 0.26) | 0.48<br>(0.36 to 0.63)            | 0.53<br>(0.40 to 0.69)            | 0.54<br>(0.41 to 0.72)            |

HR, hazard ratio; VPA, vigorous-intensity physical activity.

Sample adults who participated in the National Health Interview Survey from 1998–2018 and were eligible for linkage to the National Death Index through 2019 (N=577 909).

<sup>a</sup>Adjusted for sex, age, race/ethnicity, education, marital status, and muscle-strengthening category.

<sup>b</sup>Adjusted for sex; age; race/ethnicity; education; marital status; muscle-strengthening category; smoking status; alcohol consumption; body mass index; presence of heart disease, stroke, hypertension, diabetes, cancer, chronic obstructive pulmonary disease, and asthma; and influenza and pneumococcal vaccination status.

<sup>c</sup>Adjusted for sex; age; race/ethnicity; education; marital status; muscle-strengthening category; smoking status; alcohol consumption; body mass index; presence of heart disease, stroke, hypertension, diabetes, cancer, chronic obstructive pulmonary disease, and asthma; influenza and pneumococcal vaccination status; and light- and moderate-intensity aerobic physical activity (min/week).

**Table S7. Hazard Ratios for Influenza and Pneumonia Deaths, by Weekly Episodes of Muscle-Strengthening Activity**

| MSA (episodes/wk) | Deaths | No. (weighted %) | Person-Years | Unadjusted HR (95% CI) | Adjusted HR <sup>a</sup> (95% CI) | Adjusted HR <sup>b</sup> (95% CI) |
|-------------------|--------|------------------|--------------|------------------------|-----------------------------------|-----------------------------------|
| 0                 | 1355   | 438 147 (74.4)   | 4 522 668    | 1.00 [ref]             | 1.00 [ref]                        | 1.00 [ref]                        |
| 1                 | 12     | 18 236 (3.4)     | 182 694      | 0.30 (0.16 to 0.57)    | 1.03 (0.54 to 1.93)               | 1.09 (0.58 to 2.05)               |
| 2                 | 18     | 28 519 (5.2)     | 285 906      | 0.17 (0.11 to 0.28)    | 0.51 (0.31 to 0.83)               | 0.53 (0.33 to 0.87)               |
| 3                 | 40     | 40 996 (7.6)     | 426 890      | 0.34 (0.24 to 0.49)    | 0.93 (0.64 to 1.35)               | 0.97 (0.67 to 1.41)               |
| 4–6               | 20     | 27 528 (5.2)     | 273 241      | 0.23 (0.14 to 0.38)    | 0.73 (0.43 to 1.22)               | 0.76 (0.45 to 1.27)               |
| ≥7                | 71     | 24 483 (4.3)     | 239 327      | 1.01 (0.77 to 1.32)    | 1.43 (1.07 to 1.90)               | 1.41 (1.06 to 1.88)               |

HR, hazard ratio; MSA, muscle-strengthening activity.

Sample adults who participated in the National Health Interview Survey from 1998–2018 and were eligible for linkage to the National Death Index through 2019 (N=577 909).

<sup>a</sup>Adjusted for sex, age, race/ethnicity, education, marital status, and aerobic category.

<sup>b</sup>Adjusted for sex; age; race/ethnicity; education; marital status; smoking status; alcohol consumption; body mass index; presence of heart disease, stroke, hypertension, diabetes, cancer, chronic obstructive pulmonary disease, and asthma; influenza and pneumococcal vaccination status; and aerobic category.
